# Supplementary material
Source: PubMed Central journal article supplement (PMC3528093)

## Supplementary Data

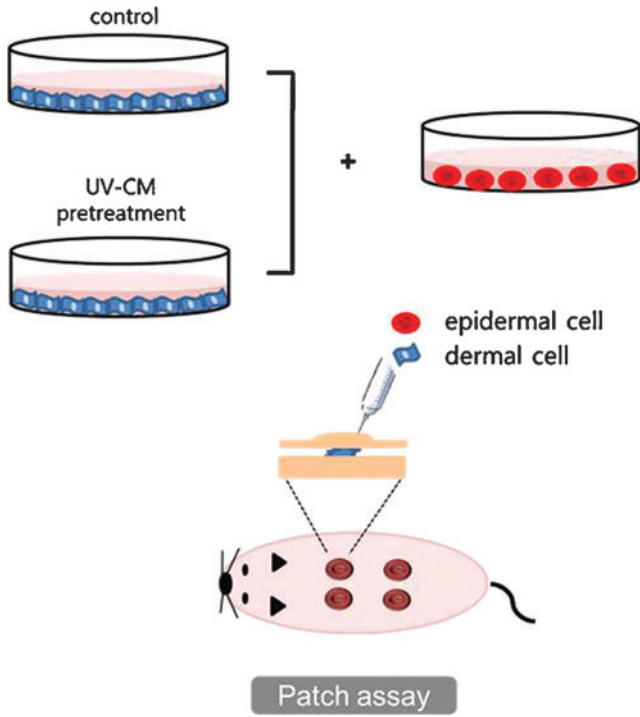

**SUPPLEMENTARY FIG. S1.** Experimental procedure for patch assay.

Supplement: Supp_Fig1.pdf [file Supp_Fig1.pdf]

## Supplementary Data

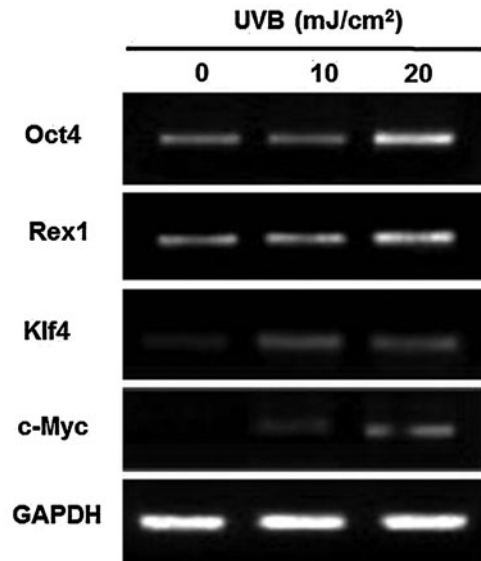

SUPPLEMENTARY FIG. S2. mRNA expression of early undifferentiation markers.

Supplement: Supp_Fig2.pdf [file Supp_Fig2.pdf]
